# Supplementary material for: 30% efficient triple-cation perovskite solar cells under indoor illumination enabled by rare earth EuCl3 doping
Source: Royal Society of Chemistry journal article supplement (doi:10.1039/d2se01312f), 2023-01-01
Supplement: d2se01312f1.pdf [file d2se01312f1.pdf]

## Supplementary information

### 30% efficient triple-cation perovskite solar cells under indoor illumination enabled by rare earth $\text{EuCl}_3$ doping

Jie Xu,<sup>a</sup> Sathy Harshavardhan Reddy,<sup>a</sup> Luigi Angelo Castriotta,<sup>a</sup> Suresh Kumar Podapangi,<sup>a</sup> Marco Luce,<sup>b</sup> Antonio Cricenti,<sup>b</sup> Aldo Di Carlo,<sup>ab</sup> and Thomas M. Brown\*<sup>a</sup>

<sup>a</sup>CHOSE (Centre for Hybrid and Organic Solar Energy), Department of Electronic Engineering, University of Rome Tor Vergata, Via del Politecnico 1, 00133 Rome, Italy.

E-mail: thomas.brown@uniroma2.it

<sup>b</sup>Istituto di Struttura della Materia (ISM-CNR), Via del Fosso del Cavaliere 100, 00133 Rome, Italy

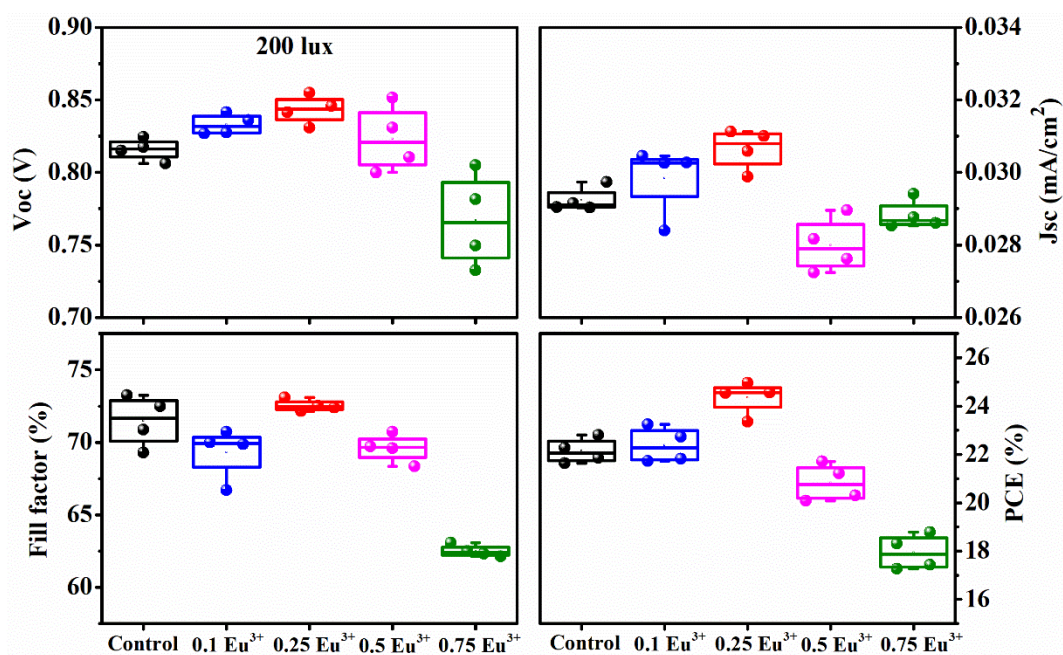

**Figure S1.** Photovoltaic parameters for triple cation perovskite solar cells incorporation with different ratio of  $\text{EuCl}_3$  (0.1, 0.25, 0.5, and 0.75 mM, abbreviated as 0.1, 0.25, 0.5, and 0.75  $\text{Eu}^{3+}$ ), measured under illumination from an LED lamp at 200 lx.

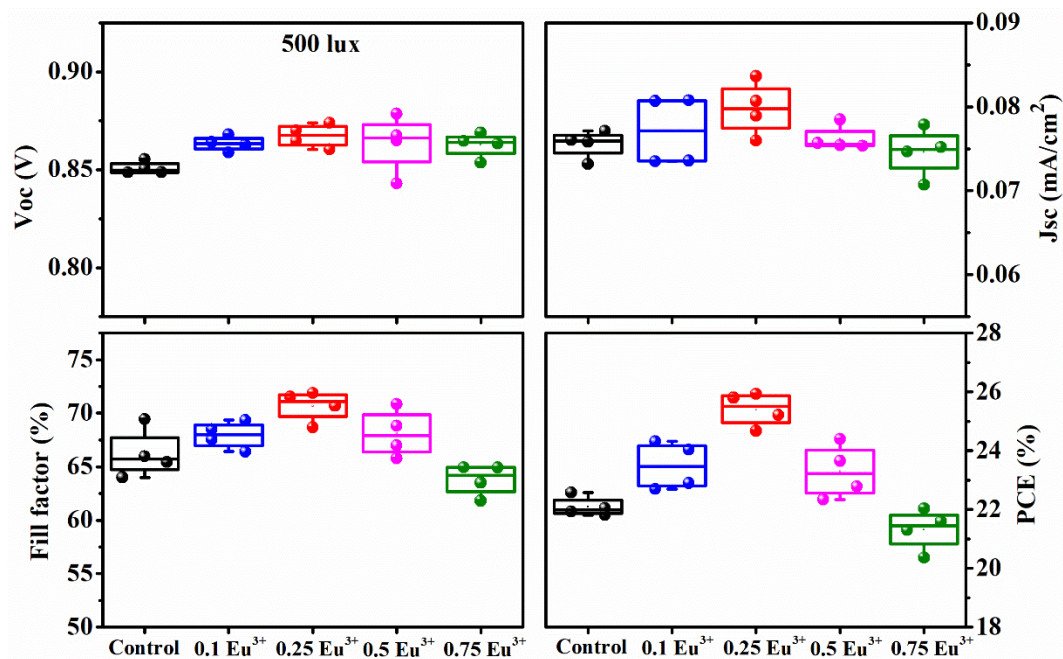

**Figure S2.** Photovoltaic parameters for triple cation perovskite solar cells incorporation with different ratio of  $\text{EuCl}_3$  (0.1, 0.25, 0.5, and 0.75 mM, abbreviated as 0.1, 0.25, 0.5, and 0.75  $\text{Eu}^{3+}$ ), measured under illumination from an LED lamp at 500 lx.

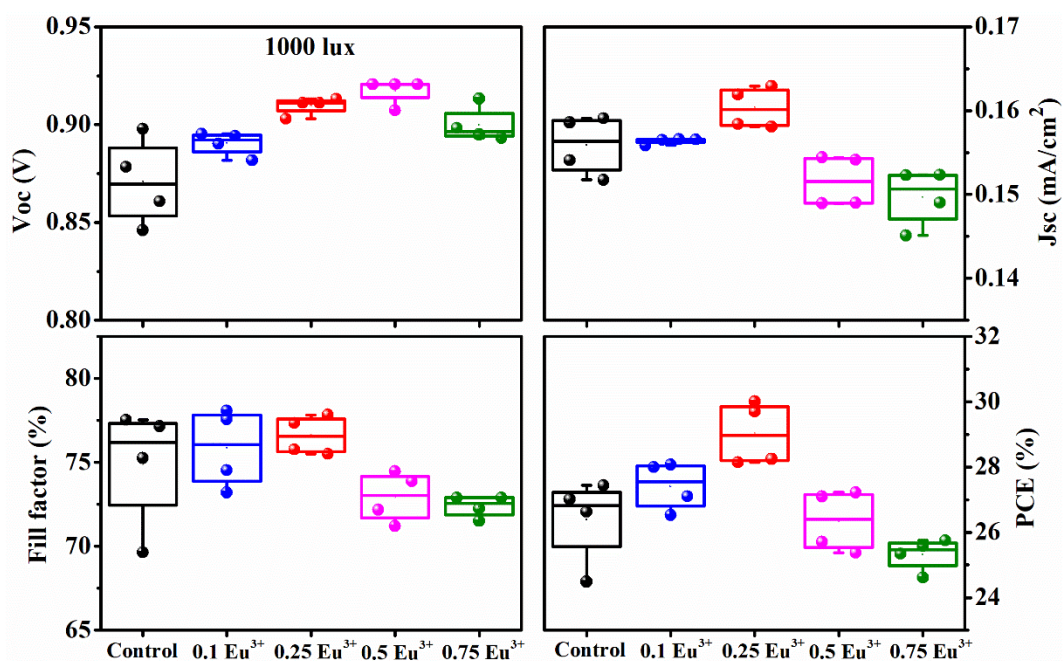

**Figure S3.** Photovoltaic parameters for triple cation perovskite solar cells incorporation with different ratio of  $\text{EuCl}_3$  (0.1, 0.25, 0.5, and 0.75 mM, abbreviated as 0.1, 0.25, 0.5, and 0.75  $\text{Eu}^{3+}$ ), measured under illumination from an LED lamp at 1000 lx.

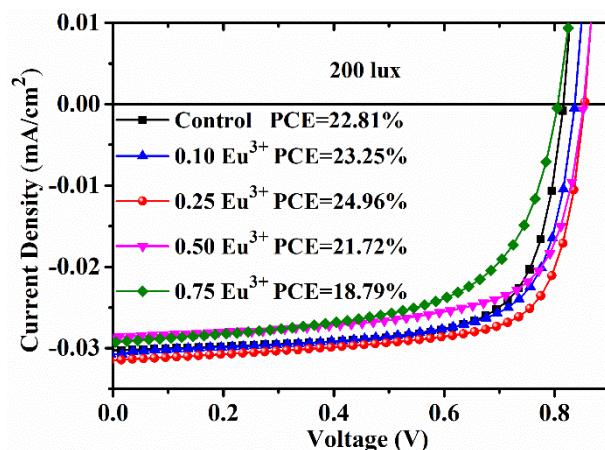

**Figure S4.** Current density-voltage (J-V) curves for the best performing devices measured under LED lamp at 200 lx.

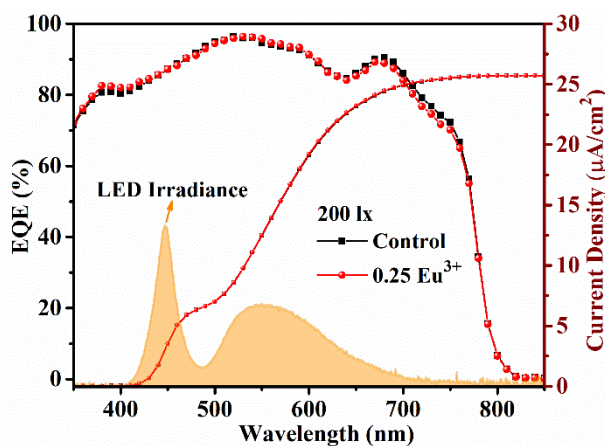

**Figure S5.** External quantum efficiency (EQE) curves and integrated  $J_{SC}$  under 200 lux for the best performing devices (control and  $0.25 \text{ Eu}^{3+}$ ), and the irradiance of LED lamp at 200 lux (OSRAM P25 white light).

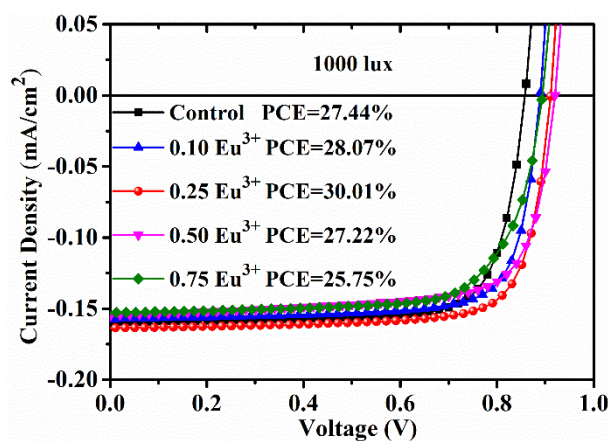

**Figure S6.** Current density-voltage (J-V) curves for the best performing devices

measured under LED lamp at 1000 lx.

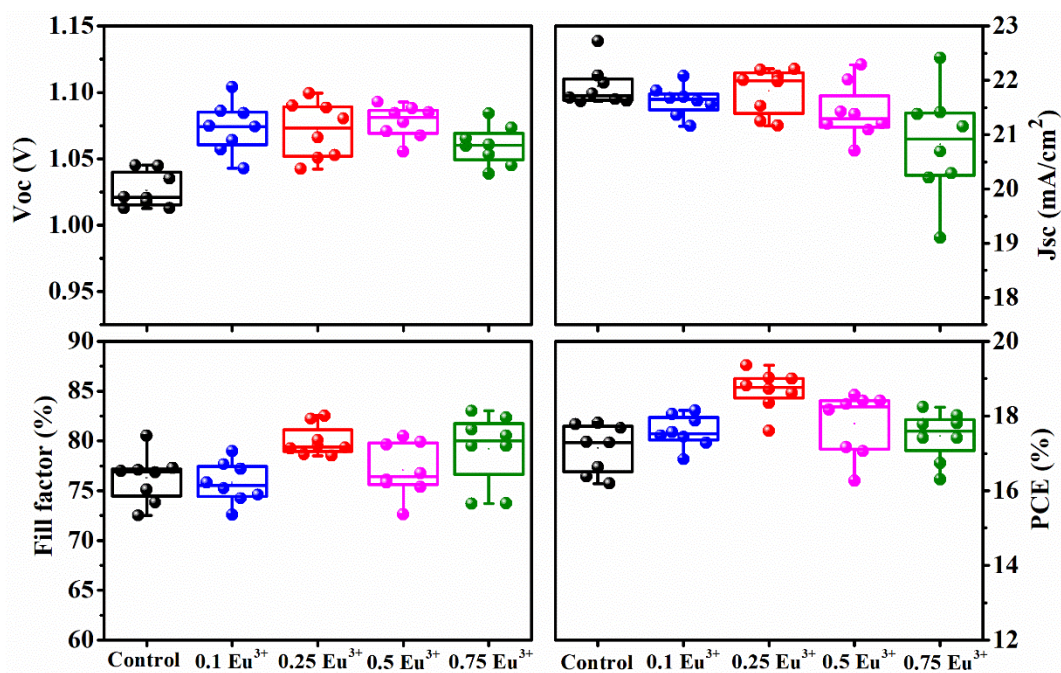

**Figure S7.** Photovoltaic parameters of perovskite solar cells incorporated with different ratio of  $\text{EuCl}_3$  (0.1, 0.25, 0.5, and 0.75 mM, abbreviated as 0.1, 0.25, 0.5, and 0.75  $\text{Eu}^{3+}$ ), measured under standard test conditions (STC, AM1.5G, 1000  $\text{W}/\text{m}^2$ , 25 °C).

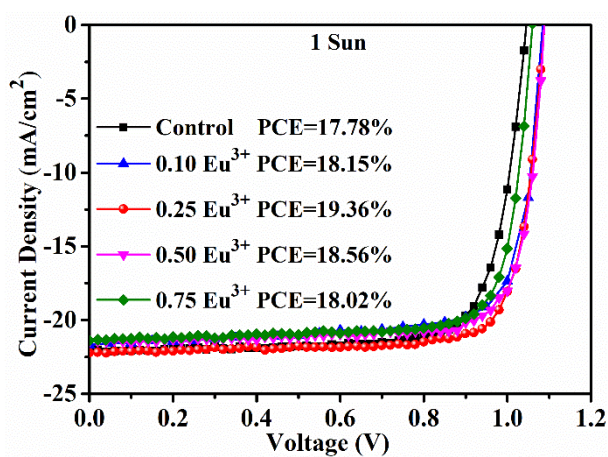

**Figure S8.** Current density-voltage (J-V) curves for the best performing devices measured under standard test conditions (STC, AM1.5G, 1000  $\text{W}/\text{m}^2$ , 25 °C).

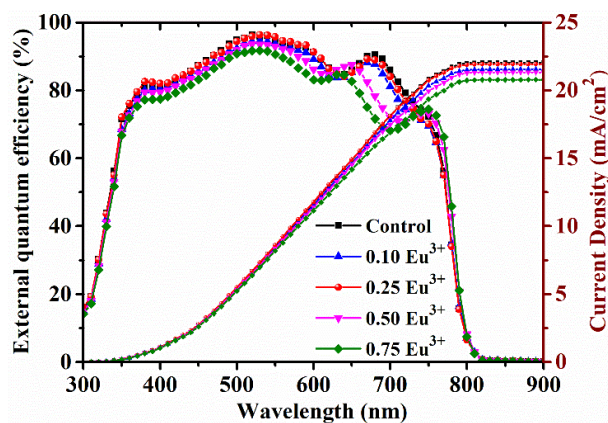

**Figure S9.** External quantum efficiency (EQE) spectra for the best performing cells were used to calculate the integrated current density ( $J_{SC}$ ) convoluted with the AM1.5G spectrum.

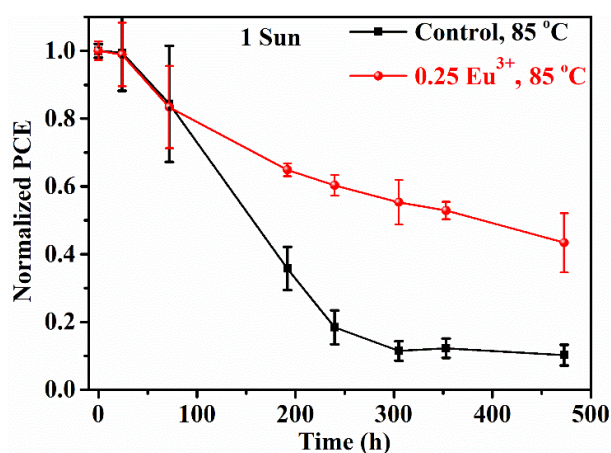

**Figure S10.** Power conversion efficiency (PCE) of unencapsulated cells measured at standard test conditions as a function of time for long-term stability tests carried out at 85 °C in ambient air (ISOS-D-2 test).

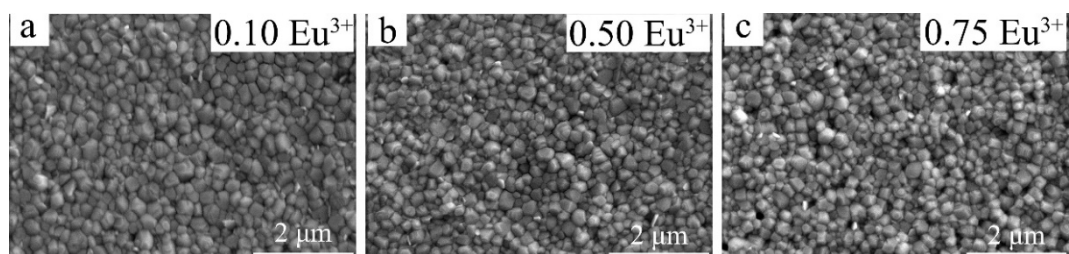

**Figure S11.** Scanning electron microscope (SEM) images of (a) 0.10  $\text{Eu}^{3+}$ , (b) 0.50  $\text{Eu}^{3+}$ , and (c) 0.75  $\text{Eu}^{3+}$  incorporated perovskite films.

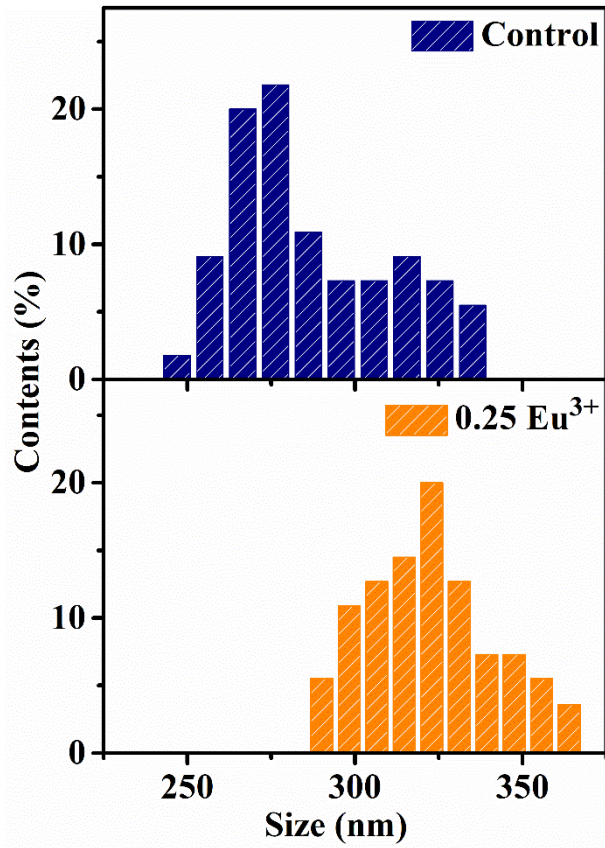

**Figure S12.** Grain size distribution of control (without EuCl<sub>3</sub> incorporated film) and 0.25 Eu<sup>3+</sup> incorporated perovskite film.

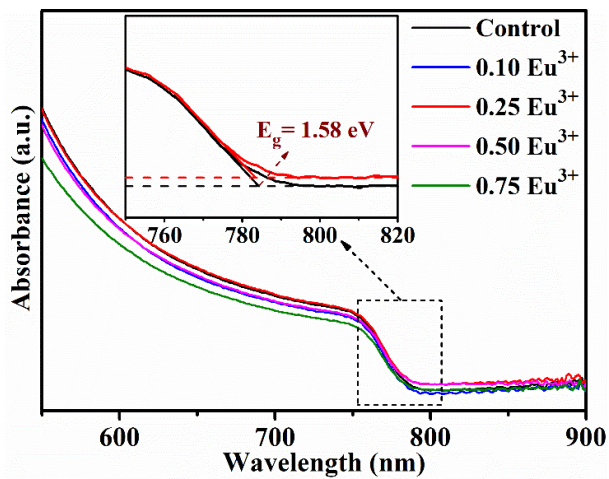

**Figure S13.** Absorption spectra, the inset is an enlarged image of the absorption edge, of different ratio of EuCl<sub>3</sub> incorporated Perovskite Films.

**Table S1.** Photovoltaic parameters for triple cation perovskite solar cells incorporation with different ratio  $\text{EuCl}_3$  (0.1, 0.25, 0.5, and 0.75 mM, abbreviated as 0.1, 0.25, 0.5, and 0.75  $\text{Eu}^{3+}$ ), measured under illumination from an LED lamp at 200 lx.

|                       | Voc<br>[V]               | Jsc<br>[mA cm <sup>-2</sup> ] | FF<br>[%]                  | PCE<br>[%]                 |
|-----------------------|--------------------------|-------------------------------|----------------------------|----------------------------|
| Control               | 0.816 ± 0.007<br>(0.815) | 0.029 ± 0.001<br>(0.030)      | 71.474 ± 1.527<br>(72.483) | 22.143 ± 0.452<br>(22.814) |
| 0.10 $\text{Eu}^{3+}$ | 0.833 ± 0.006<br>(0.836) | 0.030 ± 0.001<br>(0.030)      | 69.323 ± 1.553<br>(70.729) | 22.381 ± 0.634<br>(23.247) |
| 0.25 $\text{Eu}^{3+}$ | 0.843 ± 0.008<br>(0.855) | 0.030 ± 0.001<br>(0.031)      | 72.532 ± 0.348<br>(72.507) | 24.354 ± 0.605<br>(24.964) |
| 0.50 $\text{Eu}^{3+}$ | 0.823 ± 0.020<br>(0.852) | 0.028 ± 0.001<br>(0.028)      | 69.591 ± 0.852<br>(69.706) | 20.830 ± 0.664<br>(21.717) |
| 0.75 $\text{Eu}^{3+}$ | 0.767 ± 0.028<br>(0.805) | 0.029 ± 0.001<br>(0.029)      | 62.507 ± 0.351<br>(62.502) | 17.947 ± 0.629<br>(18.788) |

**Table S2.** Photovoltaic parameters for triple cation perovskite solar cells incorporation with different ratio  $\text{EuCl}_3$  (0.1, 0.25, 0.5, and 0.75 mM, abbreviated as 0.1, 0.25, 0.5, and 0.75  $\text{Eu}^{3+}$ ), measured under illumination from an LED lamp at 500 lx.

|                       | Voc<br>[V]               | Jsc<br>[mA cm <sup>-2</sup> ] | FF<br>[%]                  | PCE<br>[%]                 |
|-----------------------|--------------------------|-------------------------------|----------------------------|----------------------------|
| Control               | 0.851 ± 0.003<br>(0.855) | 0.076 ± 0.001<br>(0.073)      | 66.217 ± 2.000<br>(69.450) | 22.095 ± 0.292<br>(22.580) |
| 0.10 $\text{Eu}^{3+}$ | 0.863 ± 0.003<br>(0.859) | 0.077 ± 0.004<br>(0.081)      | 67.945 ± 1.094<br>(67.535) | 23.487 ± 0.698<br>(24.312) |
| 0.25 $\text{Eu}^{3+}$ | 0.867 ± 0.005<br>(0.860) | 0.080 ± 0.003<br>(0.081)      | 70.701 ± 1.249<br>(71.903) | 25.406 ± 0.500<br>(25.928) |
| 0.50 $\text{Eu}^{3+}$ | 0.864 ± 0.013<br>(0.879) | 0.076 ± 0.001<br>(0.075)      | 68.116 ± 1.918<br>(70.859) | 23.292 ± 0.792<br>(24.392) |
| 0.75 $\text{Eu}^{3+}$ | 0.863 ± 0.006<br>(0.869) | 0.075 ± 0.003<br>(0.075)      | 63.802 ± 1.279<br>(64.926) | 21.325 ± 0.611<br>(22.038) |

**Table S3.** Photovoltaic parameters for triple cation perovskite solar cells incorporation with different ratio  $\text{EuCl}_3$  (0.1, 0.25, 0.5, and 0.75 mM, abbreviated as 0.1, 0.25, 0.5, and 0.75  $\text{Eu}^{3+}$ ), measured under illumination from an LED lamp at 1000 lx.

|                       | Voc<br>[V]               | Jsc<br>[mA cm <sup>-2</sup> ] | FF<br>[%]                  | PCE<br>[%]                 |
|-----------------------|--------------------------|-------------------------------|----------------------------|----------------------------|
| Control               | 0.871 ± 0.019<br>(0.861) | 0.156 ± 0.003<br>(0.159)      | 74.895 ± 3.151<br>(77.147) | 26.393 ± 1.138<br>(27.437) |
| 0.10 $\text{Eu}^{3+}$ | 0.890 ± 0.005<br>(0.890) | 0.156 ± 0.001<br>(0.157)      | 75.844 ± 2.042<br>(77.568) | 27.424 ± 0.643<br>(28.072) |
| 0.25 $\text{Eu}^{3+}$ | 0.910 ± 0.004<br>(0.911) | 0.160 ± 0.002<br>(0.163)      | 76.618 ± 0.994<br>(77.834) | 29.028 ± 0.839<br>(30.012) |
| 0.50 $\text{Eu}^{3+}$ | 0.917 ± 0.006<br>(0.920) | 0.152 ± 0.003<br>(0.154)      | 72.932 ± 1.300<br>(73.874) | 26.350 ± 0.821<br>(27.224) |
| 0.75 $\text{Eu}^{3+}$ | 0.900 ± 0.008<br>(0.893) | 0.150 ± 0.003<br>(0.152)      | 72.383 ± 0.570<br>(72.888) | 25.322 ± 0.435<br>(25.749) |

**Table S4.** Photovoltaic parameters for triple cation perovskite solar cells incorporation with different ratio  $\text{EuCl}_3$  (0.1, 0.25, 0.5, and 0.75 mM, abbreviated as 0.1, 0.25, 0.5, and 0.75  $\text{Eu}^{3+}$ ), measured under standard test conditions (AM1.5G, 1000 W/m<sup>2</sup>, 25 °C).

|                       | Voc<br>[V]            | Jsc<br>[mA cm <sup>-2</sup> ] | FF<br>[%]               | PCE<br>[%]              |
|-----------------------|-----------------------|-------------------------------|-------------------------|-------------------------|
| Control               | 1.03 ± 0.01<br>(1.04) | 21.89 ± 0.35<br>(22.09)       | 76.27 ± 2.30<br>(76.98) | 17.13 ± 0.61<br>(17.78) |
| 0.10 $\text{Eu}^{3+}$ | 1.07 ± 0.02<br>(1.09) | 21.62 ± 0.26<br>(21.68)       | 75.79 ± 1.94<br>(77.21) | 17.59 ± 0.40<br>(18.15) |
| 0.25 $\text{Eu}^{3+}$ | 1.07 ± 0.02<br>(1.09) | 21.80 ± 0.40<br>(22.21)       | 80.01 ± 1.44<br>(80.08) | 18.69 ± 0.50<br>(19.36) |
| 0.50 $\text{Eu}^{3+}$ | 1.08 ± 0.01<br>(1.09) | 21.41 ± 0.480<br>(21.43)      | 77.08 ± 2.54<br>(79.63) | 17.79 ± 0.80<br>(18.56) |
| 0.75 $\text{Eu}^{3+}$ | 1.06 ± 0.01<br>(1.06) | 20.83 ± 0.93<br>(21.38)       | 79.19 ± 3.36<br>(79.51) | 17.46 ± 0.61<br>(18.02) |



**Table S5.** Key parameters of the Normalized time-resolved PL (TRPL) curves obtained from biexponential function fitting line.

|                             | $A_1$ | $\tau_1$ (ns) | $A_2$ | $\tau_2$ (ns) | $\tau_{\text{avg}}$ (ns) |
|-----------------------------|-------|---------------|-------|---------------|--------------------------|
| <b>Control</b>              | 0.27  | 233.7         | 0.60  | 1.8           | 229.7                    |
| <b>0.25 Eu<sup>3+</sup></b> | 0.30  | 348.6         | 0.59  | 1.8           | 345.2                    |
